# Supplementary material
Source: PubMed Central journal article supplement (PMC3026318)
Supplement: NIHMS248621-supplement-01.pdf [file NIHMS248621-supplement-01.pdf]

## SUPPLEMENTAL TABLES

**RACE-SPECIFIC EFFECT SIZES AND P-VALUES FOR RACE X RISK FACTOR INTERACTION,  
Presence of Coronary Artery Calcified Plaque,  
Adjusted for Age, Study, Race, Sex, and Race X Sex**

|                                                      | BLACK<br>Odds Ratio    | WHITE<br>Odds Ratio    | p-value |
|------------------------------------------------------|------------------------|------------------------|---------|
| Age (yrs)<br><b>For 10 years</b>                     | 2.01                   | 2.40                   | 0.07    |
| Sex<br>(ref., males)                                 | 0.68                   | 0.30                   | 0.001   |
| Study<br>(ref., MESA)                                | DHS: 3.24<br>FHS: 3.18 | DHS: 2.43<br>FHS: 1.70 | 0.12    |
| HbA1c (%) †                                          | 1.12                   | 1.11                   | 0.90    |
| Duration of<br>diabetes (yrs)<br><b>For 10 years</b> | 1.26                   | 1.34                   | 0.62    |
| LDL (mg/dL)<br><b>For 20 mg/dl</b>                   | 1.10                   | 1.03                   | 0.35    |
| HDL<br><b>For 15 mg/dl</b>                           | 0.87                   | 1.05                   | 0.10    |
| TG<br><b>For 135 mg/dl</b>                           | 1.14                   | 1.00                   | 0.17    |
| CRP<br><b>For 10 mg/L</b>                            | 1.15                   | 1.37                   | 0.89    |
| Pack-years<br><b>For 10 pack-yrs</b>                 | 1.07                   | 1.12                   | 0.45    |
| Current smoker<br>(ref., non-smoker)                 | 1.57                   | 2.49                   | 0.19    |
| Hypertension                                         | 1.44                   | 1.43                   | 0.96    |
| BMI (kg/m <sup>2</sup> )                             | 1.03                   | 1.01                   | 0.26    |

† Models of HbA1c are restricted to the MESA and DHS studies.

**RACE-SPECIFIC EFFECT SIZES AND P-VALUES FOR RACE X RISK FACTOR INTERACTION,  
Quantity of Coronary Artery Calcified Plaque,  
Adjusted for Age, Study, Race, Sex, and Race X Sex**

|                                                      | BLACK<br>Difference in<br>[log (CAC +1)] | WHITE<br>Difference in<br>[log (CAC +1)] | p-value |
|------------------------------------------------------|------------------------------------------|------------------------------------------|---------|
| Age (yrs)<br><b>For 10 years</b>                     | 1.06                                     | 1.09                                     | 0.48    |
| Sex<br>(ref., males)                                 | -0.87                                    | -1.64                                    | 0.0006  |
| Study<br>(ref., MESA)                                | DHS: 1.11<br>FHS: 0.68                   | DHS: 0.83<br>FHS: 0.22                   | 0.18    |
| HbA1c (%) †                                          | 0.08                                     | 0.07                                     | 0.90    |
| Duration of<br>diabetes (yrs)<br><b>For 10 years</b> | 0.25                                     | 0.46                                     | 0.19    |
| LDL (mg/dL)<br><b>For 20 mg/dl</b>                   | 0.06                                     | -0.08                                    | 0.05    |
| HDL<br><b>For 15 mg/dl</b>                           | -0.03                                    | -0.13                                    | 0.47    |
| TG<br><b>For 135 mg/dl</b>                           | 0.15                                     | 0.03                                     | 0.30    |
| CRP<br><b>For 10 mg/L</b>                            | -0.03                                    | -0.41                                    | 0.67    |
| Pack-years<br><b>For 10 pack-yrs</b>                 | 0.10                                     | 0.15                                     | 0.38    |
| Current smoker<br>(ref., non-smoker)                 | 0.87                                     | 0.98                                     | 0.57    |
| Hypertension                                         | 0.43                                     | 0.66                                     | 0.46    |
| BMI (kg/m <sup>2</sup> )                             | 0.01                                     | 0.02                                     | 0.76    |

† Models of HbA1c are restricted to the MESA and DHS studies.
